# Supplementary material for: Faster than light (microscopy): superiority of digital pathology over microscopy for assessment of immunohistochemistry
Source: HighWire-hosted journal article supplement (doi:10.1136/jclinpath-2021-207961), 2022-01-17
Supplement: jclinpath-2021-207961supp003_data_supplement.pdf [file jclinpath-2021-207961supp003_data_supplement.pdf]

**Supplemental Table 2**

|            | Number of obs = | 32     | R-squared =     | 0.2039 |        |
|------------|-----------------|--------|-----------------|--------|--------|
|            | Root MSE =      | 1.5038 | Adj R-squared = | 0.1490 |        |
| Source     | Partial SS      | df     | MS              | F      | Prob>F |
| Model      | 16.794996       | 2      | 8.397498        | 3.71   | 0.0367 |
| interface  | 14.624719       | 1      | 14.624719       | 6.47   | 0.0166 |
| experience | 2.1702771       | 1      | 2.1702771       | 0.96   | 0.3354 |
| Residual   | 65.580912       | 29     | 2.2614108       |        |        |
| Total      | 82.375908       | 31     | 2.6572874       |        |        |

**Supplemental Table 2A - Results of the sensitivity ANOVA on normalised time.**

|            | Number of obs = | 32     | R-squared =     | 0.2365 |        |
|------------|-----------------|--------|-----------------|--------|--------|
|            | Root MSE =      | .30009 | Adj R-squared = | 0.1839 |        |
| Source     | Partial SS      | df     | MS              | F      | Prob>F |
| Model      | .80909562       | 2      | .40454781       | 4.49   | 0.0200 |
| interface  | .7236045        | 1      | .7236045        | 8.04   | 0.0083 |
| experience | .08549113       | 1      | .08549113       | 0.95   | 0.3379 |
| Residual   | 2.6115643       | 29     | .09005394       |        |        |
| Total      | 3.4206599       | 31     | .11034387       |        |        |

**Supplemental Table 2B - Results of the sensitivity ANOVA on normalised time.**
